# Supplementary material
Source: Springer Nature journal article supplement (https://www.springermedizin.de/resource/supplementary/12885_2010_2740_MOESM7_ESM.pdf/9461856)

81BPG Primary Culture\_p1

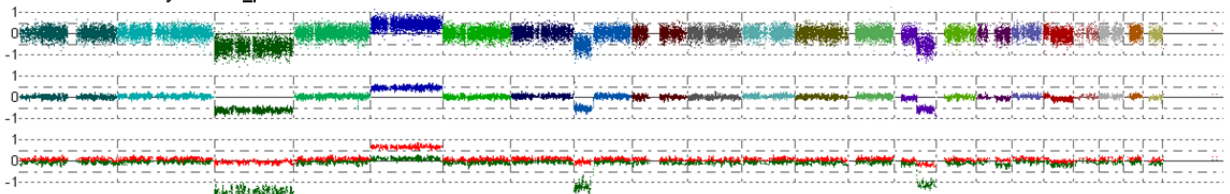

81BPG Primary Culture\_p2

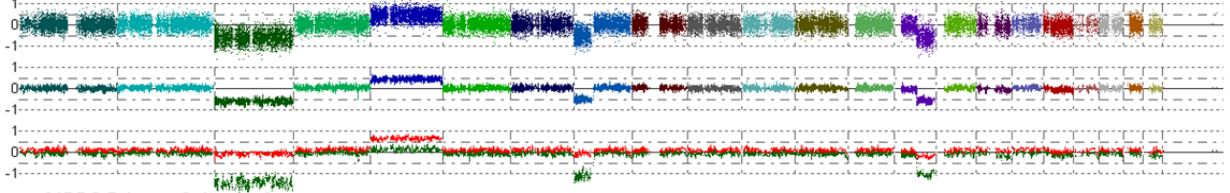

81BPG Primary Culture\_p3

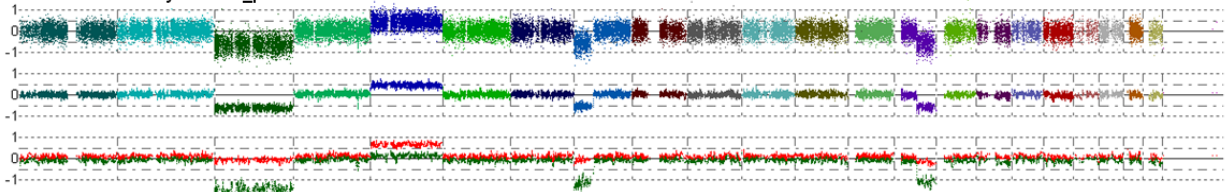

81BPG Tumor Tissue

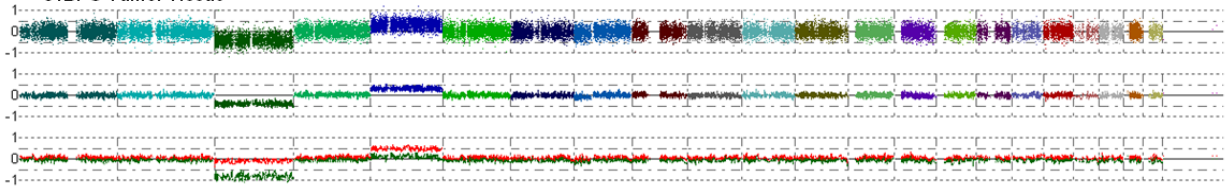

Supplement: MOESM7 [file 9461856]
